# Supplementary material
Source: PubMed Central journal article supplement (PMC7610479)

# Extended data Fig. 1

## Panel (a)

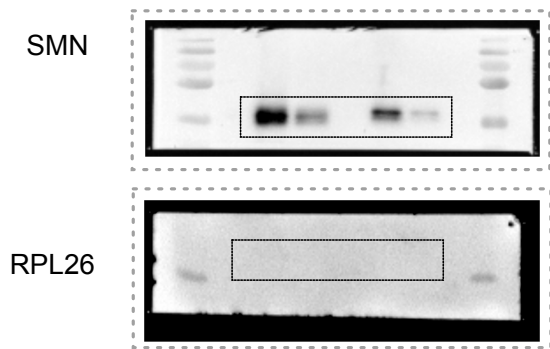

## Panel (c)

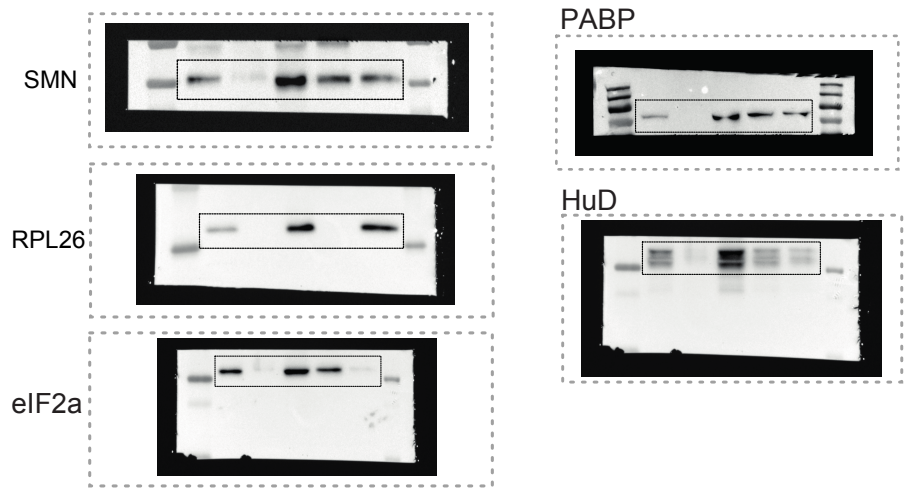

## Panel (d)

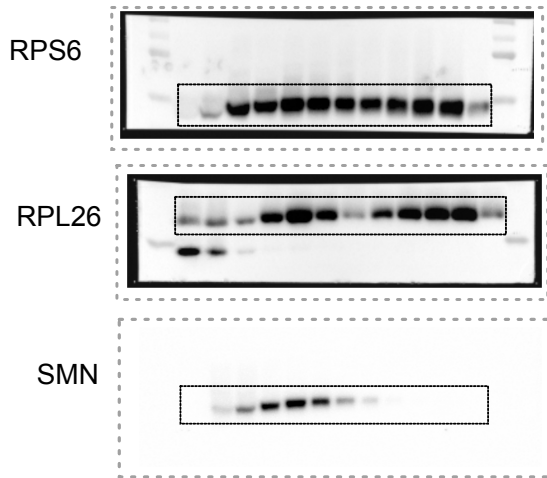

## Panel (e)

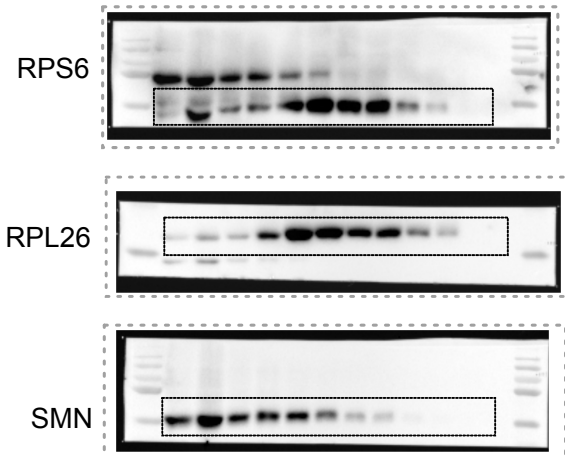

## Panel (f)

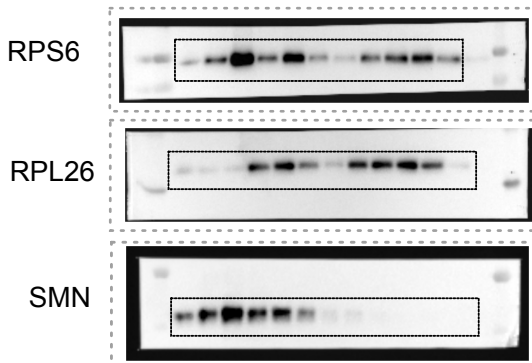

## Panel (g)

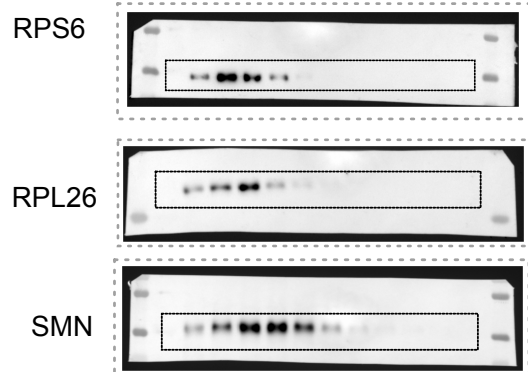

Supplement: EMS117953-supplement-Unprocessed_Gels_Extended_Data_Fig_1.pdf [file EMS117953-supplement-Unprocessed_Gels_Extended_Data_Fig_1.pdf]

# Extended data Fig. 2

*Panel (a)*

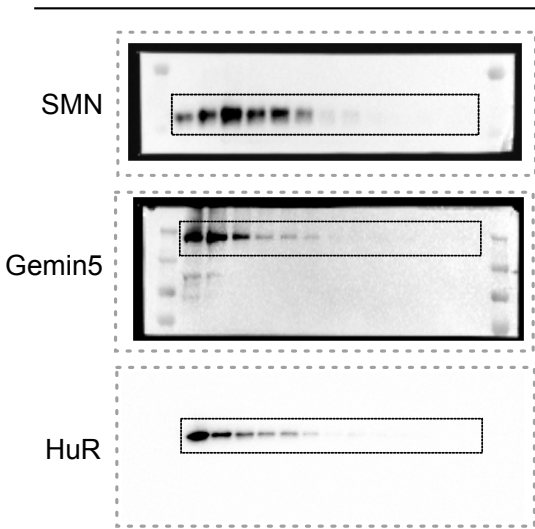

*Panel (b)*

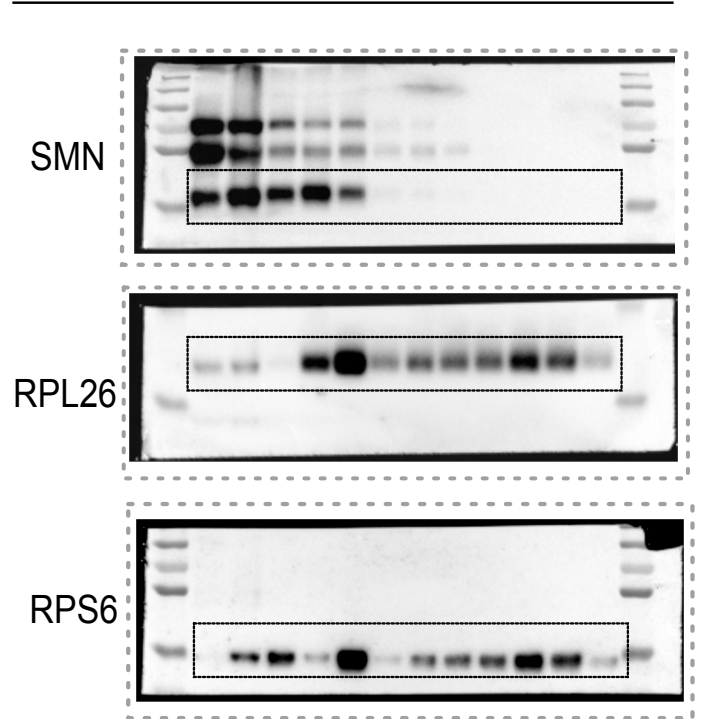

*Panel (c)*

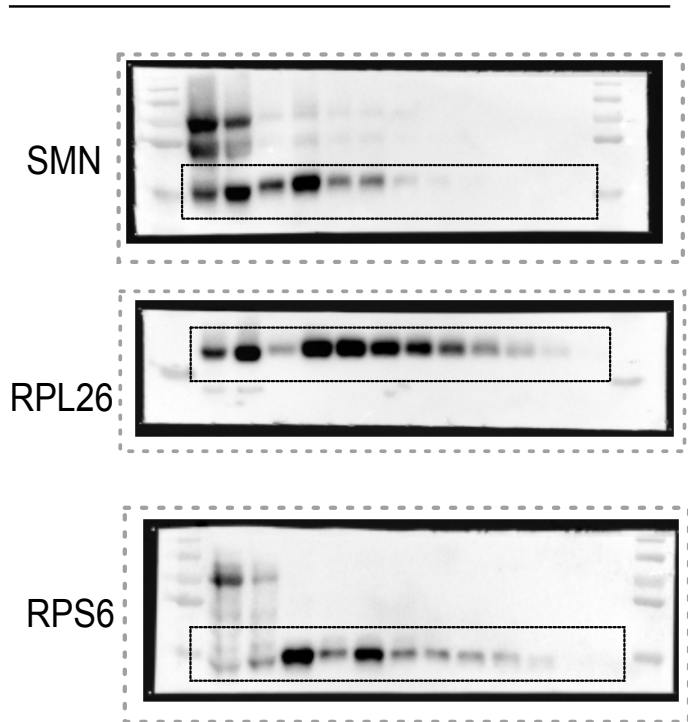

*Panel (d)*

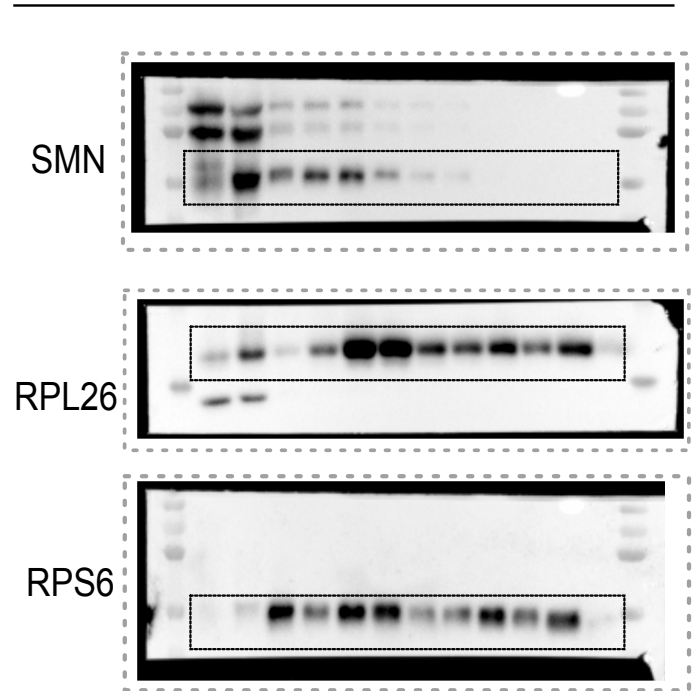

Supplement: EMS117953-supplement-Unprocessed_Gels_Extended_Data_Fig_2.pdf [file EMS117953-supplement-Unprocessed_Gels_Extended_Data_Fig_2.pdf]

# Extended data Fig. 3

## *Panel (a)*

---

RPL26

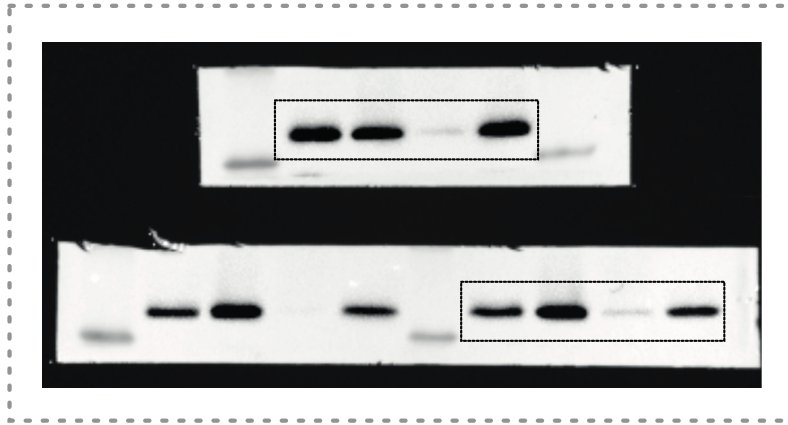

SMN

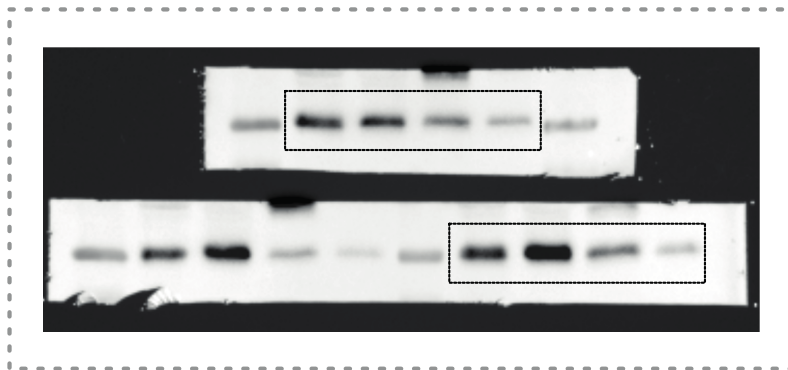

Supplement: EMS117953-supplement-Unprocessed_Gels_Extended_Data_Fig_3.pdf [file EMS117953-supplement-Unprocessed_Gels_Extended_Data_Fig_3.pdf]

# Extended data Fig. 4

## *Panel (a)*

4E-BP

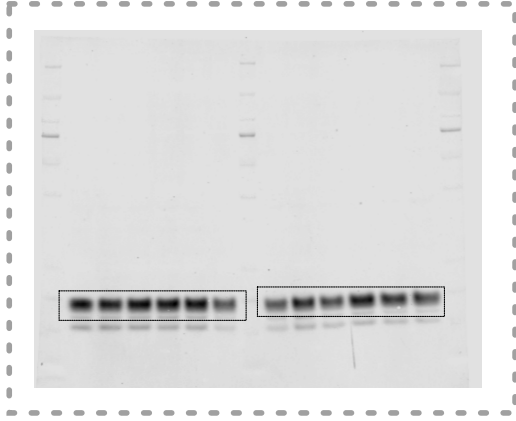

p-4E-BP

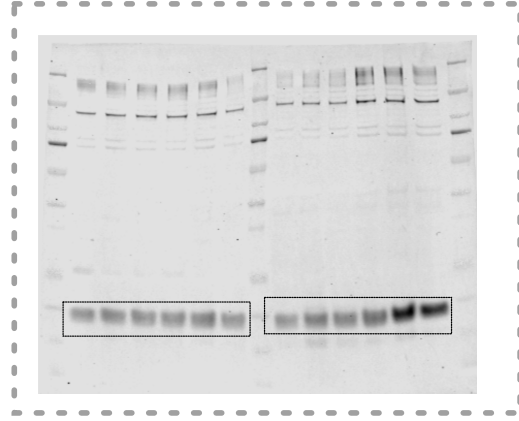

eIF2-alpha

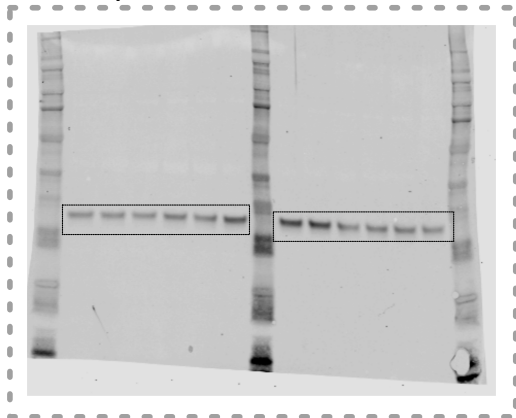

p-eIF2-alpha

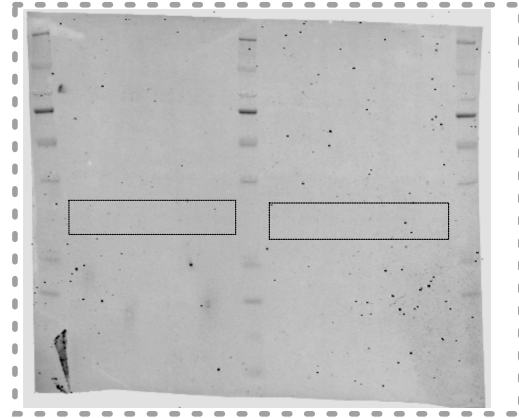

Supplement: EMS117953-supplement-Unprocessed_Gels_Extended_Data_Fig_4.pdf [file EMS117953-supplement-Unprocessed_Gels_Extended_Data_Fig_4.pdf]

# Extended data Fig. 5

## *Panel (f)*

---

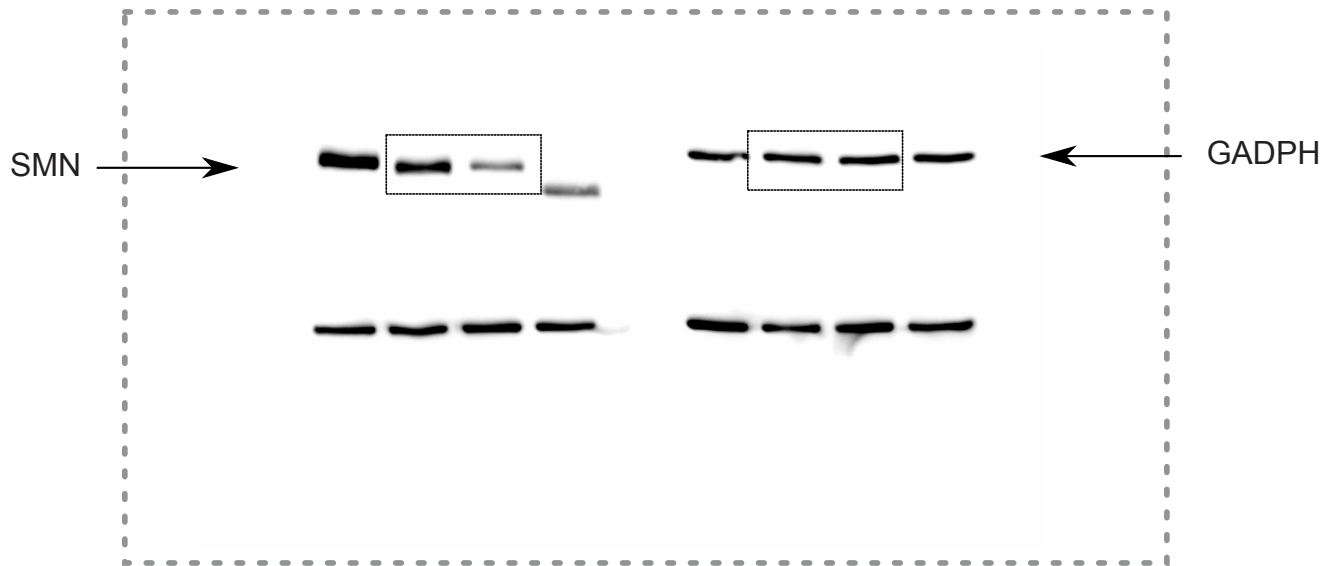

Supplement: EMS117953-supplement-Unprocessed_Gels_Extended_Data_Fig_5.pdf [file EMS117953-supplement-Unprocessed_Gels_Extended_Data_Fig_5.pdf]

# Extended Data Fig. 7

## *Panel (d)*

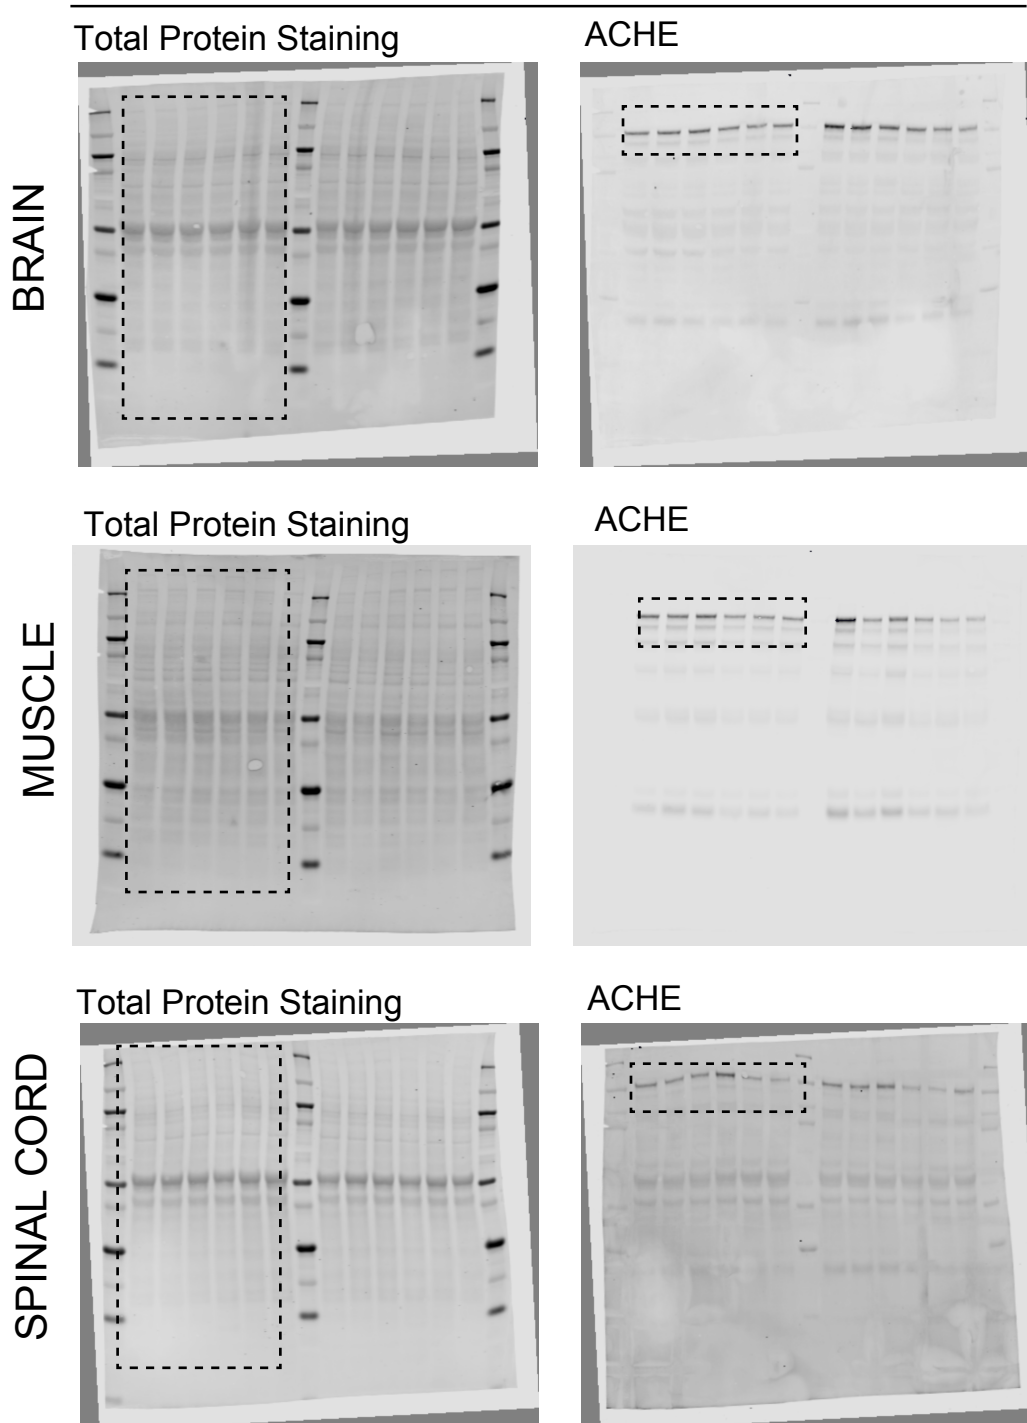

Supplement: EMS117953-supplement-Unprocessed_Gels_Extended_Data_Fig_7.pdf [file EMS117953-supplement-Unprocessed_Gels_Extended_Data_Fig_7.pdf]

# Fig. 1

## Panel (c)

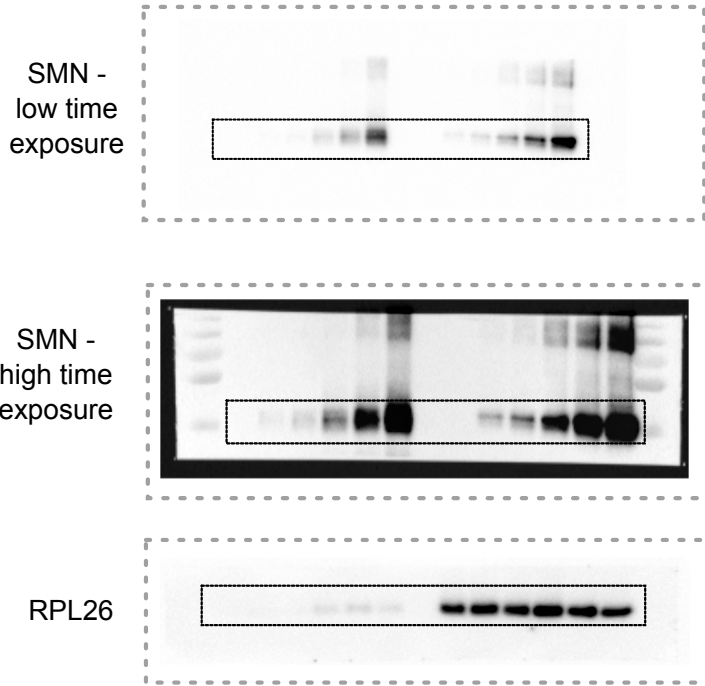

## Panel (e)

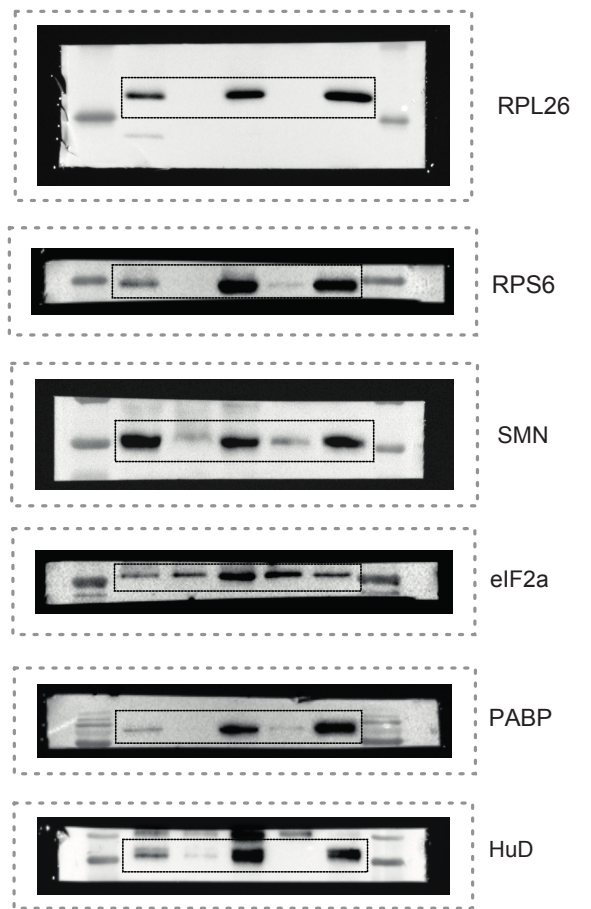

## Panel (g)

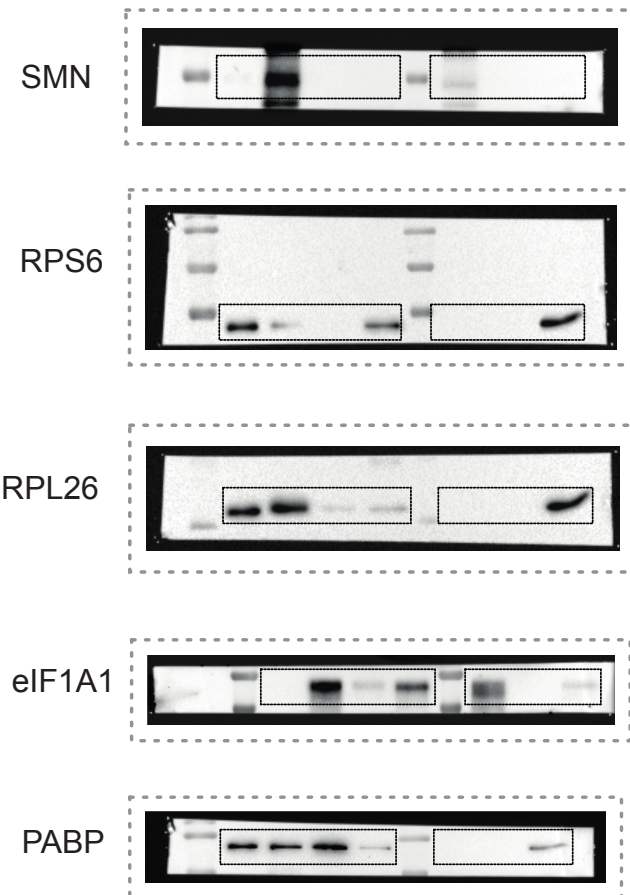

## Panel (f)

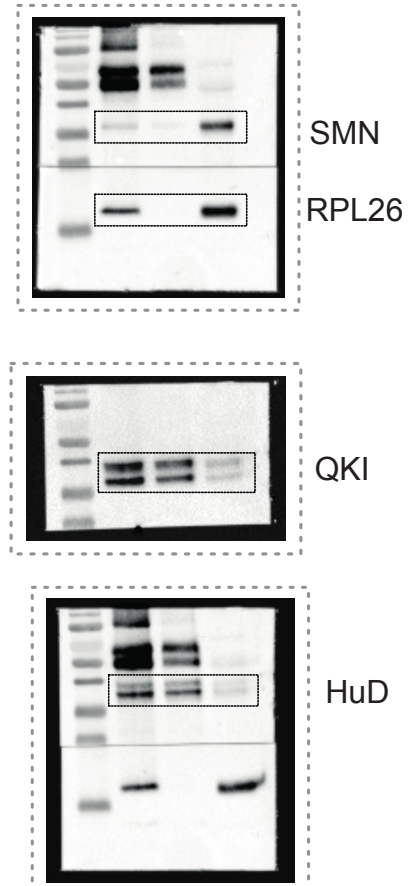

Supplement: EMS117953-supplement-Unprocessed_Gels_Fig_1.pdf [file EMS117953-supplement-Unprocessed_Gels_Fig_1.pdf]

**Fig. 2**

*Panel (a)*

SMN

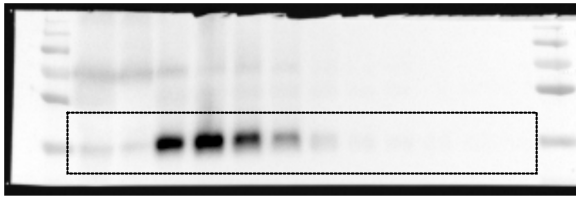

RPL26

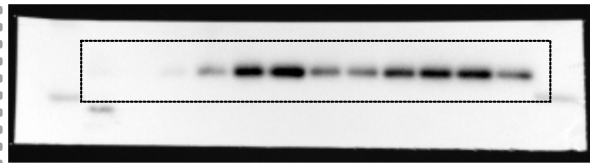

RPS6

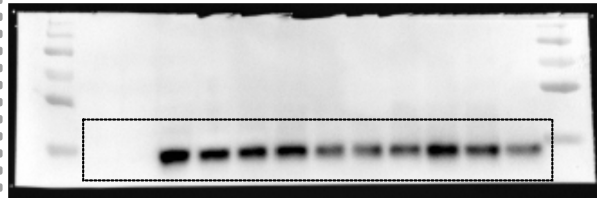

*Panel (b)*

SMN

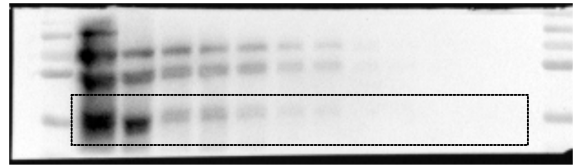

RPL26

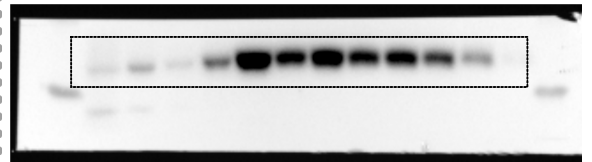

RPS6

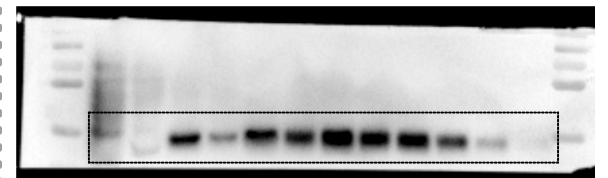

*Panel (e)*

SMN

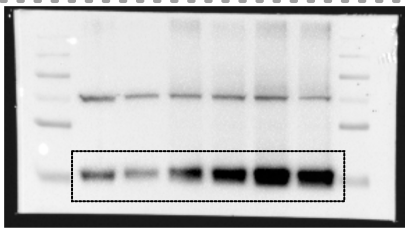

GFP

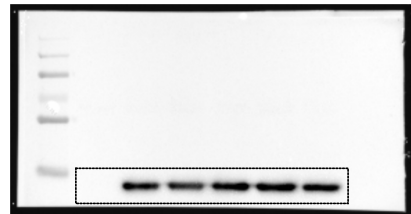

RPL26

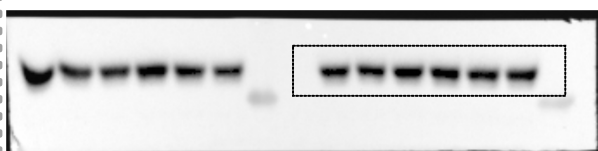

*Panel (f)*

SMN

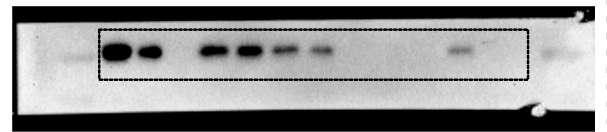

RPL26

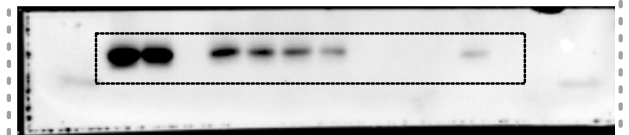

Supplement: EMS117953-supplement-Unprocessed_Gels_Fig_2.pdf [file EMS117953-supplement-Unprocessed_Gels_Fig_2.pdf]

# Fig. 6

## *Panel (f)*

---

Total Protein Staining

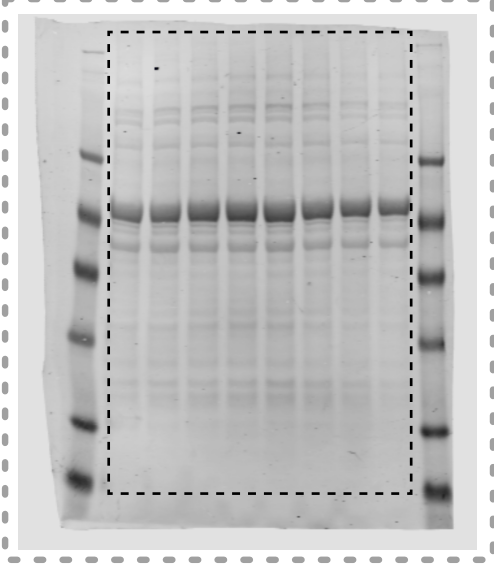

GET4

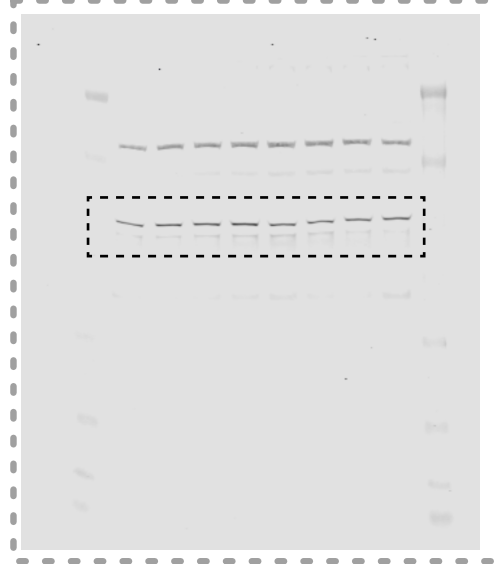

Supplement: EMS117953-supplement-Unprocessed_Gels_Fig_6.pdf [file EMS117953-supplement-Unprocessed_Gels_Fig_6.pdf]

# Fig. 7

## Panel (d)

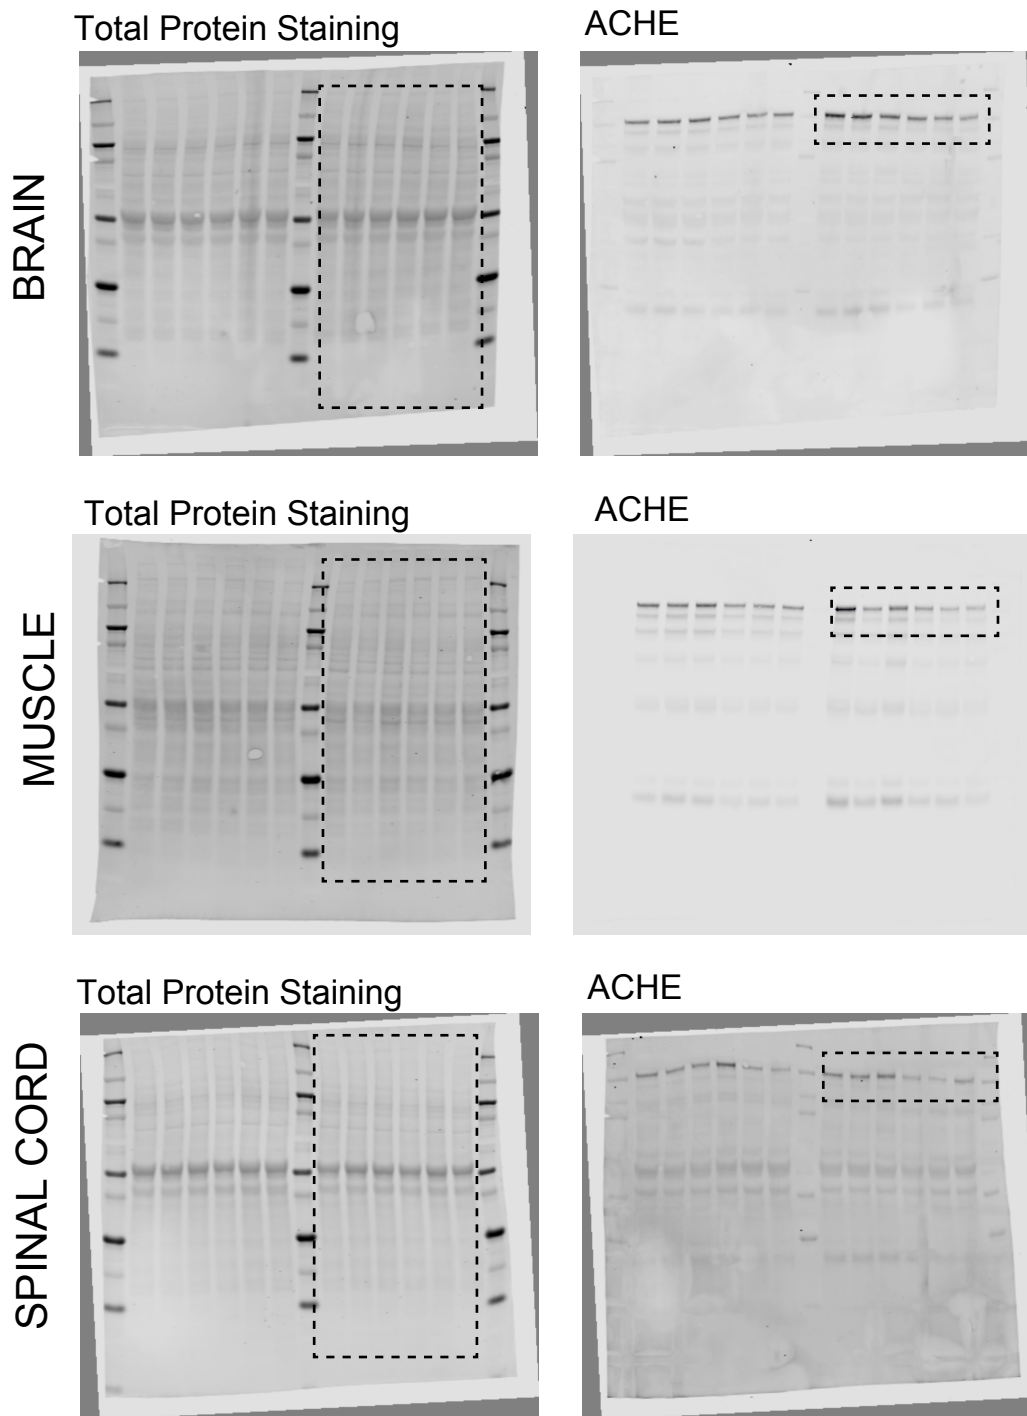

Supplement: EMS117953-supplement-Unprocessed_Gels_Fig_7.pdf [file EMS117953-supplement-Unprocessed_Gels_Fig_7.pdf]
